# Supplementary material for: Safety and Efficacy of Upadacitinib for Atopic Dermatitis in Japan: 2-Year Interim Results from the Phase 3 Rising Up Study
Source: Springer Nature journal article supplement (doi:10.1007/s13555-022-00842-7), 2022-11-19

**Safety and Efficacy of Upadacitinib for Atopic Dermatitis in Japan: 2-Year Interim Results  
From the Phase 3 Rising Up Study**

Norito Katoh • Yukihiro Ohya • Hiroyuki Murota • Masanori Ikeda • Xiaofei Hu • Kimitoshi Ikeda •  
John Liu • Takuya Sasaki • Eliza M. Raymundo • Henrique D. Teixeira • Hidehisa Saeki

N. Katoh

Department of Dermatology, Kyoto Prefectural University, Kyoto, Japan

Y. Ohya

Allergy Center, National Center for Child Health and Development, Tokyo, Japan

H. Murota

Department of Dermatology, Nagasaki University Graduate School of Biomedical Sciences,  
Nagasaki, Japan

M. Ikeda

Okayama University School of Medicine, Okayama, Japan, and Department of Pediatrics,  
Fukuyama Municipal Hospital, Hiroshima, Japan

X. Hu • J. Liu • E. M. Raymundo • H. D. Teixeira

AbbVie Inc., North Chicago, Illinois, USA

K. Ikeda • T. Sasaki

AbbVie GK, Tokyo, Japan

H. Saeki

Department of Dermatology, Nippon Medical School, Tokyo, Japan

H. D. Teixeira (✉)

AbbVie Inc., 1 North Waukegan Road, Dept. R086, Bldg. AP31-2

North Chicago, IL, USA 60064

e-mail: [henrique.teixeira@abbvie.com](mailto:henrique.teixeira@abbvie.com)

## SUPPLEMENTARY MATERIALS

**Table S1** Patient demographics and baseline characteristics among adolescents

| <b>Characteristic</b>                              | <b>Upadacitinib<br/>15 mg<sup>a</sup><br/>(N = 10)</b> | <b>Upadacitinib<br/>30 mg<sup>a</sup><br/>(N = 10)</b> | <b>Placebo<sup>a</sup><br/>(N = 9)</b> |
|----------------------------------------------------|--------------------------------------------------------|--------------------------------------------------------|----------------------------------------|
| Age, years, mean (SD)                              | 15.4 (1.9)                                             | 16.3 (1.5)                                             | 14.9 (1.6)                             |
| Sex, <i>n</i> (%)                                  |                                                        |                                                        |                                        |
| Female                                             | 3 (30.0)                                               | 2 (20.0)                                               | 2 (22.2)                               |
| Male                                               | 7 (70.0)                                               | 8 (80.0)                                               | 7 (77.8)                               |
| Weight, kg, mean (SD)                              | 51.3 (7.2)                                             | 60.7 (12.9)                                            | 58.8 (10.8)                            |
| Affected BSA, %, mean (SD)                         | 64.7 (21.5)                                            | 65.4 (25.2)                                            | 57.5 (26.3)                            |
| Disease duration since diagnosis, years, mean (SD) | 10.4 (5.1)                                             | 12.0 (4.6)                                             | 9.5 (5.1)                              |
| vIGA-AD, <i>n</i> (%)                              |                                                        |                                                        |                                        |
| Moderate (score of < 4)                            | 6 (60.0)                                               | 6 (60.0)                                               | 5 (55.6)                               |
| Severe (score of 4)                                | 4 (40.0)                                               | 4 (40.0)                                               | 4 (44.4)                               |
| EASI, mean (SD)                                    | 34.6 (13.4)                                            | 37.0 (14.7)                                            | 32.3 (16.0)                            |
| WP-NRS, mean (SD)                                  | 6.7 (1.4)                                              | 5.9 (1.1)                                              | 6.4 (1.6)                              |
| hsCRP, mg/L, mean (SD)                             | 1.7 (2.9)                                              | 0.9 (0.9)                                              | 5.1 (13.1)                             |

BSA, body surface area; EASI, Eczema Area and Severity Index; hsCRP, high-sensitivity C-reactive protein; vIGA-AD, validated Investigator Global Assessment for Atopic Dermatitis; WP-NRS, Worst Pruritus Numerical Rating Scale

<sup>a</sup>All patients received concomitant topical corticosteroids from baseline to week 16. After week 16, the use of concomitant topical corticosteroids was no longer required and was administered per investigator discretion

Table S2 Exposure-adjusted event rates through 52 weeks and 112 weeks in the Rising Up study

| Events (E/100 PY)                                    | Week 52                                                        |                                                                | Week 112                                                       |                                                                |
|------------------------------------------------------|----------------------------------------------------------------|----------------------------------------------------------------|----------------------------------------------------------------|----------------------------------------------------------------|
|                                                      | Upadacitinib<br>15 mg <sup>a</sup><br>(N = 133;<br>PY = 151.2) | Upadacitinib<br>30 mg <sup>a</sup><br>(N = 136;<br>PY = 149.7) | Upadacitinib<br>15 mg <sup>a</sup><br>(N = 133;<br>PY = 289.4) | Upadacitinib<br>30 mg <sup>a</sup><br>(N = 136;<br>PY = 287.7) |
| Overview                                             |                                                                |                                                                |                                                                |                                                                |
| Any AE                                               | 339 (224.2)                                                    | 386 (257.8)                                                    | 563 (194.5)                                                    | 594 (206.4)                                                    |
| AE with reasonable possibility of being drug related | 90 (59.5)                                                      | 108 (72.1)                                                     | 146 (50.4)                                                     | 155 (53.9)                                                     |
| Severe AE                                            | 10 (6.6)                                                       | 12 (8.0)                                                       | 20 (6.9)                                                       | 19 (6.6)                                                       |
| Serious AE                                           | 6 (4.0)                                                        | 5 (3.3)                                                        | 17 (5.9)                                                       | 11 (3.8)                                                       |
| AE leading to discontinuation of study drug          | 4 (2.6)                                                        | 3 (2.0)                                                        | 7 (2.4)                                                        | 5 (1.7)                                                        |
| Deaths                                               | 0                                                              | 0                                                              | 0                                                              | 0                                                              |
| Most common AEs <sup>b</sup>                         |                                                                |                                                                |                                                                |                                                                |
| Acne                                                 | 29 (19.2)                                                      | 46 (30.7)                                                      | 39 (13.5)                                                      | 58 (20.2)                                                      |
| Nasopharyngitis                                      | 44 (29.1)                                                      | 59 (39.4)                                                      | 51 (17.6)                                                      | 65 (22.6)                                                      |
| Herpes zoster                                        | 7 (4.6)                                                        | 19 (12.7)                                                      | 18 (6.2)                                                       | 33 (11.5)                                                      |
| Pyrexia                                              | 8 (5.3)                                                        | 7 (4.7)                                                        | 14 (4.8)                                                       | 17 (5.9)                                                       |

Table S2 Exposure-adjusted event rates through 52 weeks and 112 weeks in the Rising Up study

| Events (E/100 PY)   | Week 52                                                        |                                                                | Week 112                                                       |                                                                |
|---------------------|----------------------------------------------------------------|----------------------------------------------------------------|----------------------------------------------------------------|----------------------------------------------------------------|
|                     | Upadacitinib<br>15 mg <sup>a</sup><br>(N = 133;<br>PY = 151.2) | Upadacitinib<br>30 mg <sup>a</sup><br>(N = 136;<br>PY = 149.7) | Upadacitinib<br>15 mg <sup>a</sup><br>(N = 133;<br>PY = 289.4) | Upadacitinib<br>30 mg <sup>a</sup><br>(N = 136;<br>PY = 287.7) |
| Dermatitis atopic   | 7 (4.6)                                                        | 6 (4.0)                                                        | 17 (5.9)                                                       | 10 (3.5)                                                       |
| Skin papilloma      | 6 (4.0)                                                        | 1 (0.7)                                                        | 16 (5.5)                                                       | 7 (2.4)                                                        |
| Folliculitis        | 11 (7.3)                                                       | 4 (2.7)                                                        | 17 (5.9)                                                       | 7 (2.4)                                                        |
| Oral herpes         | 5 (3.3)                                                        | 9 (6.0)                                                        | 16 (5.5)                                                       | 11 (3.8)                                                       |
| Blood CPK increased | 3 (2.0)                                                        | 6 (4.0)                                                        | 6 (2.1)                                                        | 13 (4.5)                                                       |
| Herpes simplex      | 14 (9.3)                                                       | 7 (4.7)                                                        | 23 (7.9)                                                       | 11 (3.8)                                                       |
| Influenza           | 6 (4.0)                                                        | 11 (7.3)                                                       | 7 (2.4)                                                        | 11 (3.8)                                                       |
| Eczema herpeticum   | 9 (6.0)                                                        | 3 (2.0)                                                        | 15 (5.2)                                                       | 6 (2.1)                                                        |
| ALT increased       | 4 (2.6)                                                        | 6 (4.0)                                                        | 8 (2.8)                                                        | 10 (3.5)                                                       |
| Headache            | 5 (3.3)                                                        | 4 (2.7)                                                        | 10 (3.5)                                                       | 9 (3.1)                                                        |
| Tinea pedis         | 2 (1.3)                                                        | 5 (3.3)                                                        | 2 (0.7)                                                        | 11 (3.8)                                                       |
| Gastroenteritis     | 3 (2.0)                                                        | 3 (2.0)                                                        | 8 (2.8)                                                        | 5 (1.7)                                                        |
| Arthralgia          | 1 (0.7)                                                        | 12 (8.0)                                                       | 1 (0.3)                                                        | 13 (4.5)                                                       |

Table S2 Exposure-adjusted event rates through 52 weeks and 112 weeks in the Rising Up study

| Events (E/100 PY) | Week 52                                                        |                                                                | Week 112                                                       |                                                                |
|-------------------|----------------------------------------------------------------|----------------------------------------------------------------|----------------------------------------------------------------|----------------------------------------------------------------|
|                   | Upadacitinib<br>15 mg <sup>a</sup><br>(N = 133;<br>PY = 151.2) | Upadacitinib<br>30 mg <sup>a</sup><br>(N = 136;<br>PY = 149.7) | Upadacitinib<br>15 mg <sup>a</sup><br>(N = 133;<br>PY = 289.4) | Upadacitinib<br>30 mg <sup>a</sup><br>(N = 136;<br>PY = 287.7) |
| Dental caries     | 2 (1.3)                                                        | 2 (1.3)                                                        | 7 (2.4)                                                        | 4 (1.4)                                                        |
| Furuncle          | 6 (4.0)                                                        | 3 (2.0)                                                        | 8 (2.8)                                                        | 4 (1.4)                                                        |
| Asthma            | 2 (1.3)                                                        | 8 (5.3)                                                        | 1 (0.3)                                                        | 9 (3.1)                                                        |

AE, adverse event; ALT, alanine aminotransferase; CPK, creatine phosphokinase; E/100 PY, events per 100 patient-years; PY, patient years

<sup>a</sup>All patients received concomitant topical corticosteroids from baseline to week 16. After week 16, the use of concomitant topical corticosteroids was no longer required and was administered per investigator discretion

<sup>b</sup>Most common AEs are defined as those occurring in > 5% of patients in either group

**Table S3** Short- and long-term safety of upadacitinib among adolescents in the Rising Up study

| Parameter                                            | Week 16, <i>n</i> (%)                          |                                                |                                 | Week 112; <i>n</i> /PY ( <i>n</i> /100 PY)             |                                                        |
|------------------------------------------------------|------------------------------------------------|------------------------------------------------|---------------------------------|--------------------------------------------------------|--------------------------------------------------------|
|                                                      | Upadacitinib<br>15 mg +TCS<br>( <i>N</i> = 10) | Upadacitinib<br>30 mg +TCS<br>( <i>N</i> = 10) | Placebo +TCS<br>( <i>N</i> = 9) | Upadacitinib<br>15 mg <sup>a</sup><br>( <i>N</i> = 14) | Upadacitinib<br>30 mg <sup>a</sup><br>( <i>N</i> = 14) |
| Overview                                             |                                                |                                                |                                 |                                                        |                                                        |
| Any AE                                               | 9 (90.0)                                       | 8 (80.0)                                       | 6 (66.7)                        | 13/8.3 (155.8)                                         | 12/4.6 (260.9)                                         |
| AE with reasonable possibility of being drug related | 2 (20.0)                                       | 1 (10.0)                                       | 1 (11.1)                        | 8/19.9 (40.2)                                          | 6/21.4 (28.1)                                          |
| Severe AE                                            | 0                                              | 1 (10.0)                                       | 0                               | 2/28.3 (7.1)                                           | 1/24.9 (4.0)                                           |
| Serious AE                                           | 0                                              | 0                                              | 0                               | 3/28.0 (10.7) <sup>b</sup>                             | 0/27.2                                                 |
| AE leading to discontinuation of study drug          | 0                                              | 0                                              | 0                               | 1/30.8 (3.2)                                           | 1/27.1 (3.7)                                           |
| Deaths                                               | 0                                              | 0                                              | 0                               | 0/31.1                                                 | 0/27.2                                                 |
| Most common AEs <sup>c</sup>                         |                                                |                                                |                                 |                                                        |                                                        |
| Acne                                                 | 3 (30.0)                                       | 3 (30.0)                                       | 1 (11.1)                        | 6/20.6 (29.2)                                          | 7/13.7 (51.2)                                          |
| Nasopharyngitis                                      | 1 (10.0)                                       | 1 (10.0)                                       | 3 (33.3)                        | 4/24.5 (16.4)                                          | 7/18.3 (38.2)                                          |
| Influenza                                            | 1 (10.0)                                       | 1 (10.0)                                       | 0                               | 2/27.0 (7.4)                                           | 2/23.2 (8.6)                                           |
| Upper RTI                                            | 3 (30.0)                                       | 1 (10.0)                                       | 0                               | 3/24.1 (12.4)                                          | 1/24.7 (4.0)                                           |

**Table S3** Short- and long-term safety of upadacitinib among adolescents in the Rising Up study

| Parameter                 | Week 16, <i>n</i> (%)                          |                                                |                                 | Week 112; <i>n</i> /PY ( <i>n</i> /100 PY)             |                                                        |
|---------------------------|------------------------------------------------|------------------------------------------------|---------------------------------|--------------------------------------------------------|--------------------------------------------------------|
|                           | Upadacitinib<br>15 mg +TCS<br>( <i>N</i> = 10) | Upadacitinib<br>30 mg +TCS<br>( <i>N</i> = 10) | Placebo +TCS<br>( <i>N</i> = 9) | Upadacitinib<br>15 mg <sup>a</sup><br>( <i>N</i> = 14) | Upadacitinib<br>30 mg <sup>a</sup><br>( <i>N</i> = 14) |
| Anemia                    | 0                                              | 0                                              | 0                               | 3/28.0 (10.7)                                          | 0/27.2                                                 |
| Asthma                    | 0                                              | 1 (10.0)                                       | 0                               | 1/29.2 (3.4)                                           | 2/23.5 (8.5)                                           |
| Blood CPK increased       | 1 (10.0)                                       | 0                                              | 0                               | 2/27.2 (7.4)                                           | 1/26.8 (3.7)                                           |
| Headache                  | 0                                              | 0                                              | 0                               | 1/30.2 (3.3)                                           | 2/25.6 (7.8)                                           |
| Otitis externa            | 0                                              | 0                                              | 0                               | 2/28.5 (7.0)                                           | 1/26.2 (3.8)                                           |
| Pharyngitis               | 0                                              | 1 (10.0)                                       | 0                               | 1/29.7 (3.4)                                           | 2/23.8 (8.4)                                           |
| Pyrexia                   | 1 (10.0)                                       | 1 (10.0)                                       | 0                               | 2/27.5 (7.3)                                           | 1/24.9 (4.0)                                           |
| Skin papilloma            | 0                                              | 0                                              | 0                               | 1/30.8 (3.2)                                           | 2/25.9 (7.7)                                           |
| Enterocolitis             | 0                                              | 0                                              | 0                               | 0/31.1                                                 | 2/25.3 (7.9)                                           |
| Gastroenteritis           | 0                                              | 0                                              | 1 (11.1)                        | 2/30.2 (6.6)                                           | 0/27.2                                                 |
| Hepatic function abnormal | 0                                              | 0                                              | 0                               | 2/30.2 (6.6)                                           | 0/27.2                                                 |
| Herpes zoster             | 0                                              | 0                                              | 0                               | 0/31.1                                                 | 2/26.3 (7.6)                                           |
| Impetigo                  | 0                                              | 0                                              | 0                               | 2/30.0 (6.7)                                           | 0/27.2                                                 |



**Table S3** Short- and long-term safety of upadacitinib among adolescents in the Rising Up study

| Parameter | Week 16, <i>n</i> (%)                          |                                                |                                 | Week 112; <i>n</i> /PY ( <i>n</i> /100 PY)             |                                                        |
|-----------|------------------------------------------------|------------------------------------------------|---------------------------------|--------------------------------------------------------|--------------------------------------------------------|
|           | Upadacitinib<br>15 mg +TCS<br>( <i>N</i> = 10) | Upadacitinib<br>30 mg +TCS<br>( <i>N</i> = 10) | Placebo +TCS<br>( <i>N</i> = 9) | Upadacitinib<br>15 mg <sup>a</sup><br>( <i>N</i> = 14) | Upadacitinib<br>30 mg <sup>a</sup><br>( <i>N</i> = 14) |

AE, adverse event; CPK, creatine phosphokinase; *n*/100 PY, number of patients with at least one event per 100 patient-years; *n*/PY, number of patients with at least one event divided by the total patient years for patients at risk of an event; RTI, respiratory tract infection; TCS, topical corticosteroids; UPA, upadacitinib

<sup>a</sup>After week 16, the use of concomitant topical corticosteroids was no longer required and was administered per investigator discretion

<sup>b</sup>Serious AEs included appendicitis (possibly related to study drug), concussion due to accident (unrelated to study drug), and irritable bowel syndrome (unrelated to study drug)

<sup>c</sup>Most common AEs are defined as those occurring in  $\geq$  two patients in either adolescent treatment group at week 112

**Table S4** Exposure-adjusted event rates for AEsIs through 52 weeks and 112 weeks in the Rising Up study

| AEsI, events (E/100 PY)                                   | Week 52                                                        |                                                                | Week 112                                                       |                                                                |
|-----------------------------------------------------------|----------------------------------------------------------------|----------------------------------------------------------------|----------------------------------------------------------------|----------------------------------------------------------------|
|                                                           | Upadacitinib<br>15 mg <sup>a</sup><br>(N = 133;<br>PY = 151.2) | Upadacitinib<br>30 mg <sup>a</sup><br>(N = 136;<br>PY = 149.7) | Upadacitinib<br>15 mg <sup>a</sup><br>(N = 133;<br>PY = 289.4) | Upadacitinib<br>30 mg <sup>a</sup><br>(N = 136;<br>PY = 287.7) |
| Serious infections                                        | 4 (2.6)                                                        | 4 (2.7)                                                        | 6 (2.1)                                                        | 4 (1.4)                                                        |
| Opportunistic infection excluding TB<br>and herpes zoster | 10 (6.6)                                                       | 3 (2.0)                                                        | 16 (5.5)                                                       | 7 (2.4)                                                        |
| Malignancy                                                | 0                                                              | 0                                                              | 1 (0.3)                                                        | 0                                                              |
| NMSC                                                      | 0                                                              | 0                                                              | 0                                                              | 0                                                              |
| Malignancy excluding NMSC                                 | 0                                                              | 0                                                              | 1 (0.3)                                                        | 0                                                              |
| Lymphoma                                                  | 0                                                              | 1 (0.7)                                                        | 0                                                              | 1 (0.3)                                                        |
| Hepatic disorder                                          | 8 (5.3)                                                        | 11 (7.3)                                                       | 18 (6.2)                                                       | 19 (6.6)                                                       |
| Gastrointestinal perforation                              | 0                                                              | 0                                                              | 0                                                              | 0                                                              |
| Anemia                                                    | 4 (2.6)                                                        | 7 (4.7)                                                        | 5 (1.7)                                                        | 9 (3.1)                                                        |
| Neutropenia                                               | 2 (1.3)                                                        | 8 (5.3)                                                        | 2 (0.7)                                                        | 12 (4.2)                                                       |
| Lymphopenia                                               | 0                                                              | 1 (0.7)                                                        | 0                                                              | 2 (0.7)                                                        |
| Herpes zoster                                             | 8 (5.3)                                                        | 21 (14.0)                                                      | 21 (7.3)                                                       | 37 (12.9)                                                      |
| CPK elevation                                             | 3 (2.0)                                                        | 6 (4.0)                                                        | 6 (2.1)                                                        | 13 (4.5)                                                       |

**Table S4** Exposure-adjusted event rates for AESIs through 52 weeks and 112 weeks in the Rising Up study

| AESI, events (E/100 PY)       | Week 52                                                        |                                                                | Week 112                                                       |                                                                |
|-------------------------------|----------------------------------------------------------------|----------------------------------------------------------------|----------------------------------------------------------------|----------------------------------------------------------------|
|                               | Upadacitinib<br>15 mg <sup>a</sup><br>(N = 133;<br>PY = 151.2) | Upadacitinib<br>30 mg <sup>a</sup><br>(N = 136;<br>PY = 149.7) | Upadacitinib<br>15 mg <sup>a</sup><br>(N = 133;<br>PY = 289.4) | Upadacitinib<br>30 mg <sup>a</sup><br>(N = 136;<br>PY = 287.7) |
| Renal dysfunction             | 0                                                              | 0                                                              | 0                                                              | 0                                                              |
| Active TB                     | 0                                                              | 0                                                              | 0                                                              | 0                                                              |
| Adjudicated MACE <sup>b</sup> | 1 (0.7)                                                        | 0                                                              | 1 (0.3)                                                        | 0                                                              |
| Adjudicated VTE <sup>c</sup>  | 0                                                              | 0                                                              | 0                                                              | 0                                                              |

AESI, adverse event of special interest; MACE, major adverse cardiovascular event, E/100 PY, events per 100 patient-years; NMSC, non-melanoma skin cancer; TB, tuberculosis; VTE, venous thromboembolic events

<sup>a</sup>All patients received concomitant topical corticosteroids from baseline to week 16. After week 16, the use of concomitant topical corticosteroids was no longer required and was administered per investigator discretion

<sup>b</sup>MACE is defined as cardiovascular death, non-fatal myocardial infarction, and non-fatal stroke

<sup>c</sup>VTE is defined as deep vein thrombosis and pulmonary embolism (fatal and non-fatal)

**Table S5** Short-term incidence and long-term exposure-adjusted incidence rates for AESIs among adolescents in the Rising Up study

| Parameter                                              | Week 16, <i>n</i> (%)                           |                                                 |                                     | Week 112; <i>n</i> /PY ( <i>n</i> /100 PY)             |                                                        |
|--------------------------------------------------------|-------------------------------------------------|-------------------------------------------------|-------------------------------------|--------------------------------------------------------|--------------------------------------------------------|
|                                                        | Upadacitinib<br>15 mg + TCS<br>( <i>N</i> = 10) | Upadacitinib<br>30 mg + TCS<br>( <i>N</i> = 10) | Placebo<br>+ TCS<br>( <i>N</i> = 9) | Upadacitinib<br>15 mg <sup>a</sup><br>( <i>N</i> = 14) | Upadacitinib<br>30 mg <sup>a</sup><br>( <i>N</i> = 14) |
| Serious infections                                     | 0                                               | 0                                               | 0                                   | 1/29.6 (3.4)                                           | 0/27.2                                                 |
| Opportunistic infection excluding TB and herpes zoster | 1 (10.0)                                        | 0                                               | 0                                   | 1/30.8 (3.2)                                           | 0/27.2                                                 |
| Malignancy                                             | 0                                               | 0                                               | 0                                   | 0/31.1                                                 | 0/27.2                                                 |
| NMSC                                                   | 0                                               | 0                                               | 0                                   | 0/31.1                                                 | 0/27.2                                                 |
| Malignancy excluding NMSC                              | 0                                               | 0                                               | 0                                   | 0/31.1                                                 | 0/27.2                                                 |
| Lymphoma                                               | 0                                               | 0                                               | 0                                   | 0/31.1                                                 | 1/27.1 (3.7)                                           |
| Hepatic disorder                                       | 0                                               | 0                                               | 0                                   | 3/29.5 (10.2)                                          | 1/26.1 (3.8)                                           |
| Gastrointestinal perforation                           | 0                                               | 0                                               | 0                                   | 0/31.1                                                 | 0/27.2                                                 |
| Anemia                                                 | 0                                               | 0                                               | 0                                   | 3/28.0 (10.7)                                          | 0/27.2                                                 |
| Neutropenia                                            | 0                                               | 0                                               | 0                                   | 0/31.1                                                 | 1/26.1 (3.8)                                           |
| Lymphopenia                                            | 0                                               | 0                                               | 0                                   | 0/31.1                                                 | 0/27.2                                                 |
| Herpes zoster                                          | 0                                               | 0                                               | 0                                   | 0/31.1                                                 | 2/26.3 (7.6)                                           |
| CPK elevation                                          | 1 (10.0)                                        | 0                                               | 0                                   | 2/27.2 (7.4)                                           | 1/26.8 (3.7)                                           |

**Table S5** Short-term incidence and long-term exposure-adjusted incidence rates for AESIs among adolescents in the Rising Up study

| Parameter         | Week 16, <i>n</i> (%)                           |                                                 |                                     | Week 112; <i>n</i> /PY ( <i>n</i> /100 PY)             |                                                        |
|-------------------|-------------------------------------------------|-------------------------------------------------|-------------------------------------|--------------------------------------------------------|--------------------------------------------------------|
|                   | Upadacitinib<br>15 mg + TCS<br>( <i>N</i> = 10) | Upadacitinib<br>30 mg + TCS<br>( <i>N</i> = 10) | Placebo<br>+ TCS<br>( <i>N</i> = 9) | Upadacitinib<br>15 mg <sup>a</sup><br>( <i>N</i> = 14) | Upadacitinib<br>30 mg <sup>a</sup><br>( <i>N</i> = 14) |
| Renal dysfunction | 0                                               | 0                                               | 0                                   | 0/31.1                                                 | 0/27.2                                                 |
| Active TB         | 0                                               | 0                                               | 0                                   | 0/31.1                                                 | 0/27.2                                                 |
| Adjudicated MACE  | 0                                               | 0                                               | 0                                   | 0/31.1                                                 | 0/27.2                                                 |
| Adjudicated VTE   | 0                                               | 0                                               | 0                                   | 0/31.1                                                 | 0/27.2                                                 |

AESI, adverse event of special interest; MACE, major adverse cardiovascular event, *n*/100 PY, number of patients with at least one event per 100 patient-years; *n*/PY, number of patients with at least one event divided by the total patient years for patients at risk of an event; NMSC, non-melanoma skin cancer; TB, tuberculosis; TCS, topical corticosteroids; VTE, venous thromboembolic events

<sup>a</sup>After week 16, the use of concomitant topical corticosteroids was no longer required and was administered per investigator discretion

**Table 6** Institutional review boards and ethics committees for the Rising Up study

| <b>IRB/IEC Name</b>                                              | <b>City</b>   | <b>State/Province, Country</b> |
|------------------------------------------------------------------|---------------|--------------------------------|
| Nihon University Hospitals' Joint Institutional Review Board     | Itabashi-Ku   | Tokyo, Japan                   |
| Kansai Rosai Hospital IRB                                        | Amagasaki-shi | Hyogo, Japan                   |
| Toyama Prefectural Central Hospital Institutional Review Board   | Toyama-shi    | Toyama, Japan                  |
| Nihonbashi Sakura Clinic Institutional Review Board              | Chuo-ku       | Tokyo, Japan                   |
| Tokyo Rosai Hospital IRB                                         | Ohta-ku       | Tokyo, Japan                   |
| Nihonbashi Sakura Clinic Institutional Review Board              | Chuo-ku       | Tokyo, Japan                   |
| Tokyo Eki Center Building Clinic Institutional Review Board      | Chuo-ku       | Tokyo, Japan                   |
| Asahikawa Medical University Hospital Institutional Review Board | Asahikawa-shi | Hokkaido, Japan                |
| Fukuyama City Hospital IRB                                       | Fukuyama-shi  | Hiroshima, Japan               |
| Nakameguro Atlas Clinic IRB                                      | Meguro-ku     | Tokyo, Japan                   |
| Japan Conference of Clinical Research                            | Toshima-ku    | Tokyo, Japan                   |
| Joint Institutional Review Board                                 | Kochi-shi     | Kochi, Japan                   |
| Central Japan International Medical Center IRB                   | Minokamo-shi  | Gifu, Japan                    |
| Joint Institutional Review Board                                 | Kochi-shi     | Kochi, Japan                   |
| Nakameguro Atlas Clinic IRB                                      | Meguro-ku     | Tokyo, Japan                   |
| Joint Institutional Review Board                                 | Kochi-shi     | Kochi, Japan                   |

**Table 6** Institutional review boards and ethics committees for the Rising Up study

| <b>IRB/IEC Name</b>                                                      | <b>City</b>    | <b>State/Province, Country</b> |
|--------------------------------------------------------------------------|----------------|--------------------------------|
| Hyogo Prefectural Amagasaki General Medical Center IRB                   | Amagasaki-shi  | Hyogo, Japan                   |
| Joint Institutional Review Board                                         | Kochi-shi      | Kochi, Japan                   |
| Tokai University Hospital–Isehara Campus                                 | Isehara-Shi    | Kanagawa, Japan                |
| Nihonbashi Sakura Clinic Institution Review Borad                        | Chuo-ku        | Tokyo, Japan                   |
| Nakameguro Atlas Clinic IRB                                              | Meguro-ku      | Tokyo, Japan                   |
| Joint Institutional Review Board                                         | Kochi-shi      | Kochi, Japan                   |
| Nihonbashi Sakura Clinic Institutional Review Board                      | Chuo-ku        | Tokyo, Japan                   |
| Ichinomiya Municipal Hospital Institutional Review Board                 | Ichinomiya-shi | Aichi, Japan                   |
| Tokyo Eki Center Building Clinic Institutional Review Board              | Chuo-ku        | Tokyo, Japan                   |
| Joint Institutional Review Board                                         | Kochi-shi      | Kochi, Japan                   |
| Nagoya City University Institutional Review Board                        | Nagoya-shi     | Aichi, Japan                   |
| Gunma University Hospital Institutional Review Board                     | Maebashi-shi   | Gunma, Japan                   |
| Joint Institutional Review Board                                         | Kochi-shi      | Kochi, Japan                   |
| Nippon Medical School Musashi Kosugi Hospital Institutional Review Board | Kawasaki-shi   | Kanagawa, Japan                |
| Kiryu Kosei General Hospital Institutional Review Board                  | KIRYU-SHI      | Gunma, Japan                   |
| Kobe University Hospital Institutional Review Board                      | Kobe-shi       | Hyogo, Japan                   |

**Table 6** Institutional review boards and ethics committees for the Rising Up study

| <b>IRB/IEC Name</b>                                                          | <b>City</b>  | <b>State/Province, Country</b> |
|------------------------------------------------------------------------------|--------------|--------------------------------|
| Yokohama Rosai Hospital Institutional Review Board                           | Yokhama-shi  | Kanagawa, Japan                |
| Joint Institutional Review Board                                             | Kochi-shi    | Kochi, Japan                   |
| Nagasaki University Hospital Institutional Review Board                      | Nagasaki-shi | Nagasaki, Japan                |
| Tokyo Allergy and Respiratory Disease Research Institute IRB                 | Taito-ku     | Tokyo, Japan                   |
| Shizuoka General Hospital Institutional Review Board                         | Shizuoka shi | Shizuoka, Japan                |
| Joint Institutional Review Board                                             | Kochi-shi    | Kochi, Japan                   |
| Hokkaido P.W.F.A.C Sapporo-Kosei General Hospital Institutional Review Board | Sapporo-shi  | Hokkaido, Japan                |
| Tokyo Eki Center Building Clinic Institutional Review Board                  | Chuo-ku      | Tokyo, Japan                   |
| Nihonbashi Sakura Clinic Institutional Review Board                          | Chuo-ku      | Tokyo, Japan                   |
| Joint Institutional Review Board                                             | Kochi-shi    | Kochi, Japan                   |
| Nagaoka Red Cross Hospital Institutional Review Board                        | Nagaoka-shi  | Niigata, Japan                 |

IEC, international ethics committee; IRB, institutional review board



**Fig. S1** Adolescents achieving EASI 75 and EASI 90 from baseline to week 112. Data are presented as observed cases with no imputation for missing data. All patients received concomitant topical corticosteroids from baseline to week 16. After week 16, the use of concomitant topical corticosteroids was no longer required and was administered per investigator discretion. EASI 75/90,  $\geq 75\%$ / $\geq 90\%$  improvement in Eczema Area Severity Index; PBO, placebo; UPA, upadacitinib

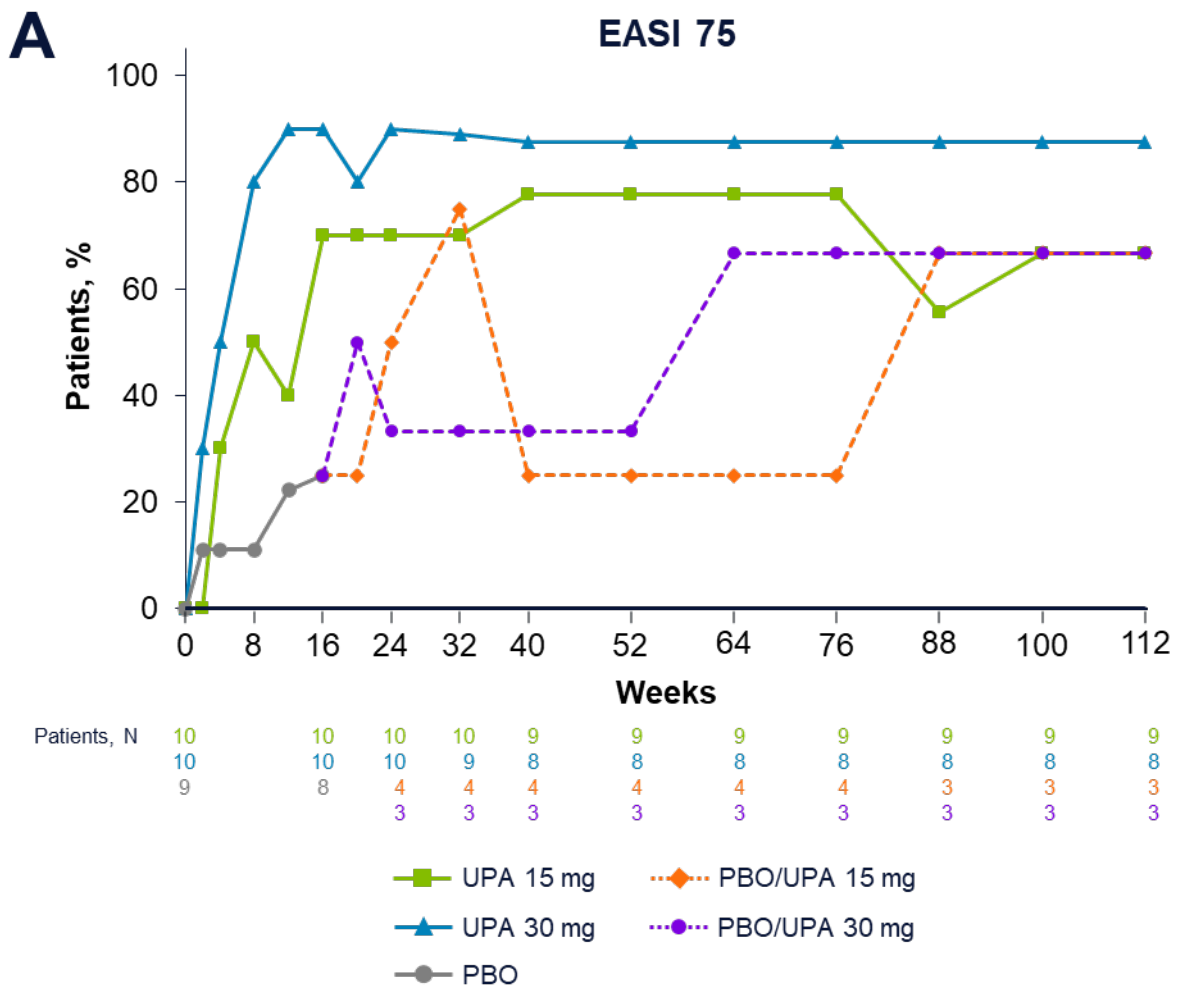

**B****EASI 90**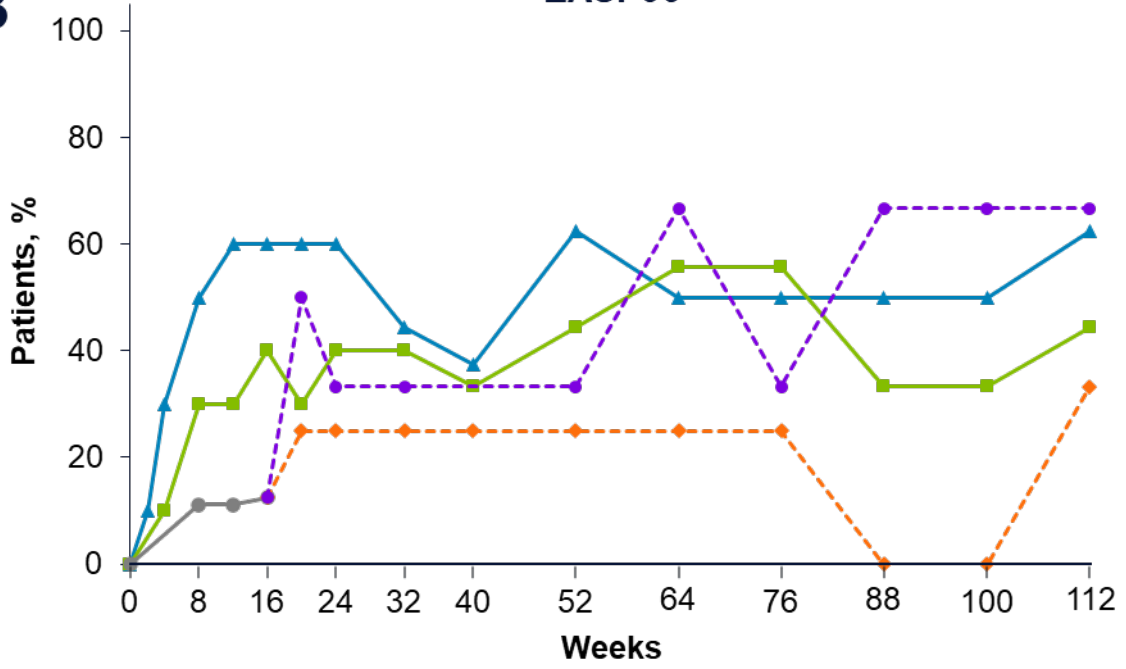

| Weeks | UPA 15 mg | UPA 30 mg | PBO | PBO/UPA 15 mg | PBO/UPA 30 mg |
|-------|-----------|-----------|-----|---------------|---------------|
| 0     | 10        | 10        | 9   |               |               |
| 4     | 10        | 10        | 8   |               |               |
| 8     | 10        | 10        | 8   |               |               |
| 12    | 10        | 10        | 8   |               |               |
| 16    | 10        | 10        | 8   |               | 3             |
| 20    | 10        | 10        | 8   | 3             | 3             |
| 24    | 10        | 10        | 8   | 3             | 3             |
| 32    | 10        | 10        | 8   | 3             | 3             |
| 40    | 9         | 8         | 8   | 3             | 3             |
| 52    | 9         | 8         | 8   | 3             | 3             |
| 64    | 9         | 8         | 8   | 3             | 3             |
| 76    | 9         | 8         | 8   | 3             | 3             |
| 88    | 9         | 8         | 8   | 3             | 3             |
| 100   | 9         | 8         | 8   | 3             | 3             |
| 112   | 9         | 8         | 8   | 3             | 3             |

- UPA 15 mg
- ▲ UPA 30 mg
- PBO
- ◆ PBO/UPA 15 mg
- PBO/UPA 30 mg

**Fig. 2** Adolescents achieving vIGA-AD 0/1<sup>a</sup> from baseline to week 112. Data are presented as observed cases with no imputation for missing data. All patients received concomitant topical corticosteroids from baseline to week 16. After week 16, the use of concomitant topical corticosteroids was no longer required and was administered per investigator discretion.

<sup>a</sup>Patients achieving vIGA-AD 0/1 with at least two grades of reduction from baseline. AD, atopic dermatitis; PBO, placebo; UPA, upadacitinib; vIGA-AD 0/1, validated Investigator Global Assessment for AD score of clear or almost clear.

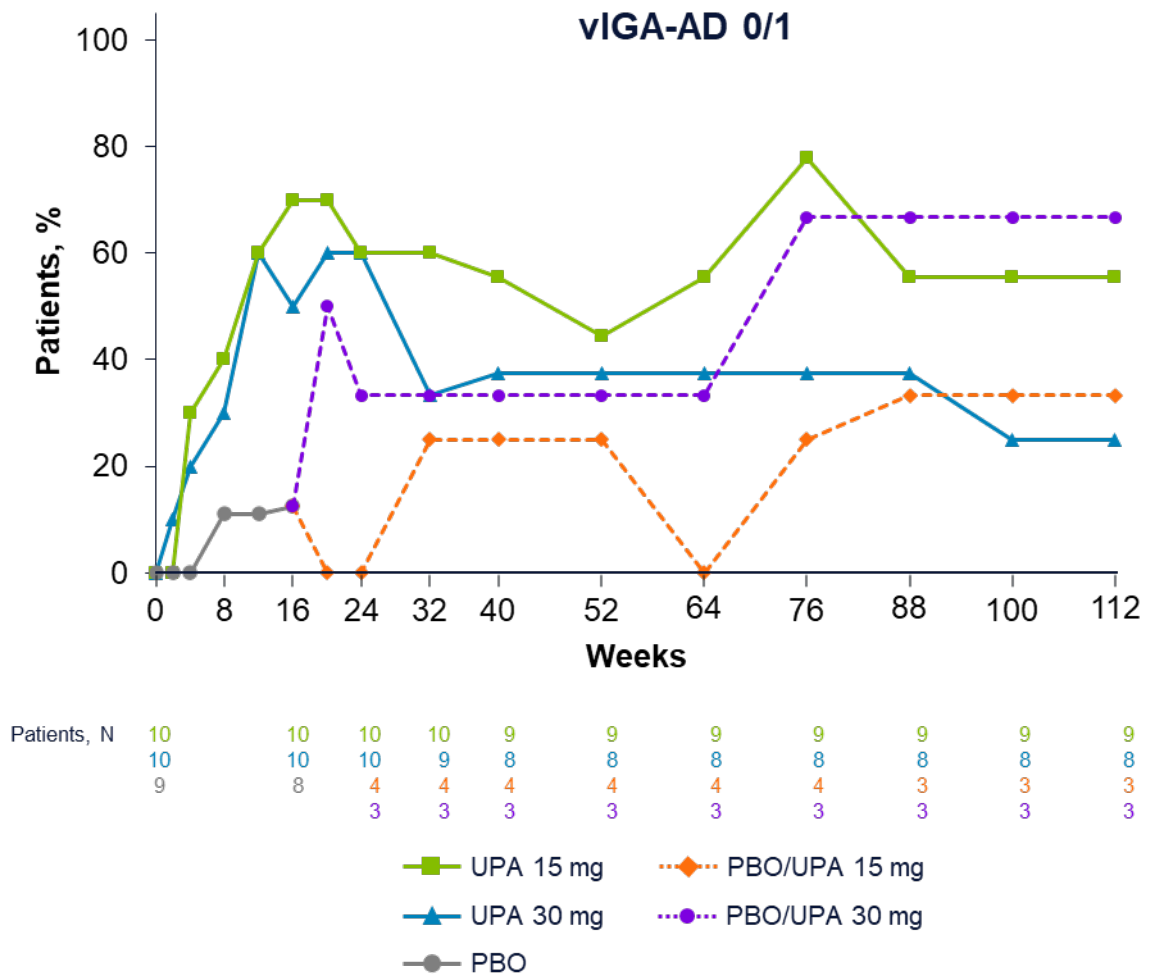

**Fig. 3** Adolescents achieving WP-NRS  $\geq 4$ -point improvement<sup>a</sup> from baseline to week 112. Data are presented as observed cases with no imputation for missing data. All patients received concomitant topical corticosteroids from baseline to week 16. After week 16, the use of concomitant topical corticosteroids was no longer required and was administered per investigator discretion. <sup>a</sup>Among patients with WP-NRS scores  $\geq 4$  at baseline. PBO, placebo; UPA, upadacitinib; WP-NRS, Worst Pruritus Numerical Rating Scale.

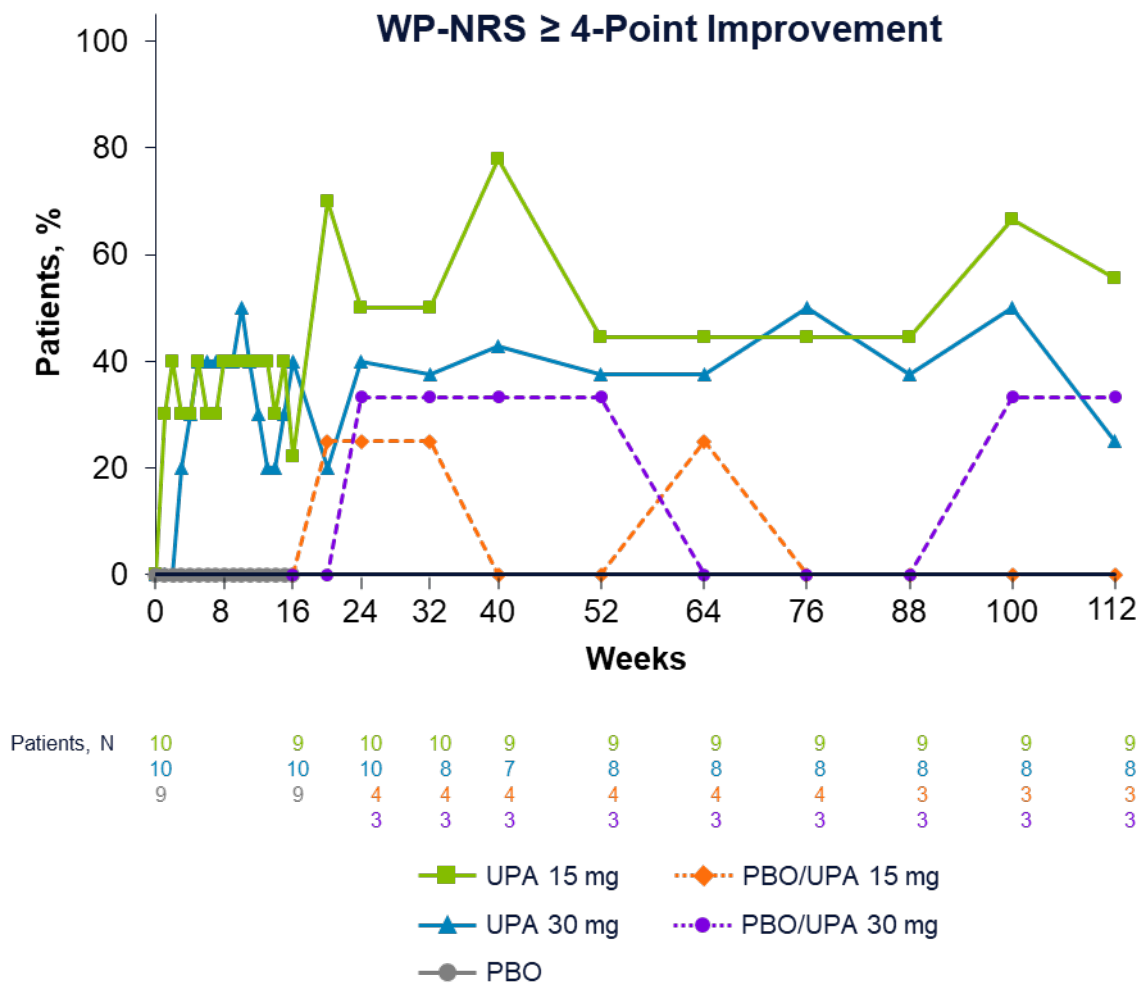

Supplement: MOESM1 [file 23730496]
